# Supplementary material
Source: publisher figshare collection journal article supplement (https://tandf.figshare.com/articles/dataset/_/3175123)
Supplement: Supplementary file 1 [file 2]

```

#$ -cwd
#$ -N GeneTorrent
#$ -l h_rt=144:00:00
XML=$(find /work/m/mdsamy/Manifests/ -name "*.xml")
for File in $XML; do
    mkdir /work/m/mdsamy/BAM_Files
    /work/m/mdsamy/cghub/bin/gtdownload -v -c /work/m/mdsamy/cghub.key
$File -p /work/m/mdsamy/BAM_Files/ 2>&1 | tee DownloadProgress.txt
    BAM=$(find /work/m/mdsamy/BAM_Files/ -name "*.bam")
    /work/m/mdsamy/samtools-1.0/samtools mpileup -Buf
/work/m/mdsamy/GRCh37-lite.fa -r 8:128747806-128751279 $BAM |
/work/m/mdsamy/bcftools-1.0/bcftools call -mv -Oz >
/work/m/mdsamy/MYC.vcf.gz
    /work/m/mdsamy/samtools-1.0/samtools mpileup -Buf
/work/m/mdsamy/GRCh37-lite.fa -r 11:534692-537718 $BAM |
/work/m/mdsamy/bcftools-1.0/bcftools call -mv -Oz >
/work/m/mdsamy/HRAS.vcf.gz
    /work/m/mdsamy/samtools-1.0/samtools mpileup -Buf
/work/m/mdsamy/GRCh37-lite.fa -r 5:112043080-112043917 $BAM |
/work/m/mdsamy/bcftools-1.0/bcftools call -mv -Oz >
/work/m/mdsamy/APC.vcf.gz
    /work/m/mdsamy/samtools-1.0/samtools mpileup -Buf
/work/m/mdsamy/GRCh37-lite.fa -r 18:49868378-49868759 $BAM |
/work/m/mdsamy/bcftools-1.0/bcftools call -mv -Oz >
/work/m/mdsamy/DCC.vcf.gz
    /work/m/mdsamy/samtools-1.0/samtools mpileup -Buf
/work/m/mdsamy/GRCh37-lite.fa -r 13:48877460-48878501 $BAM |
/work/m/mdsamy/bcftools-1.0/bcftools call -mv -Oz >
/work/m/mdsamy/RB1a.vcf.gz
    /work/m/mdsamy/samtools-1.0/samtools mpileup -Buf
/work/m/mdsamy/GRCh37-lite.fa -r 13:48890958-48891549 $BAM |
/work/m/mdsamy/bcftools-1.0/bcftools call -mv -Oz >
/work/m/mdsamy/RB1b.vcf.gz
    /work/m/mdsamy/samtools-1.0/samtools mpileup -Buf
/work/m/mdsamy/GRCh37-lite.fa -r 13:48892636-48893857 $BAM |
/work/m/mdsamy/bcftools-1.0/bcftools call -mv -Oz >
/work/m/mdsamy/RB1c.vcf.gz
    /work/m/mdsamy/bcftools-1.0/bcftools query -H -f
'%CHROM:%POS, [%TGT], %INFO/DP4{0}+%INFO/DP4{1}, %INFO/DP4{2}+%INFO/DP4{3}\n'
' /work/m/mdsamy/MYC.vcf.gz >> /work/m/mdsamy/MYC.csv
    /work/m/mdsamy/bcftools-1.0/bcftools query -H -f
'%CHROM:%POS, [%TGT], %INFO/DP4{0}+%INFO/DP4{1}, %INFO/DP4{2}+%INFO/DP4{3}\n'
' /work/m/mdsamy/HRAS.vcf.gz >> /work/m/mdsamy/HRAS.csv
    /work/m/mdsamy/bcftools-1.0/bcftools query -H -f
'%CHROM:%POS, [%TGT], %INFO/DP4{0}+%INFO/DP4{1}, %INFO/DP4{2}+%INFO/DP4{3}\n'
' /work/m/mdsamy/APC.vcf.gz >> /work/m/mdsamy/APC.csv
    /work/m/mdsamy/bcftools-1.0/bcftools query -H -f
'%CHROM:%POS, [%TGT], %INFO/DP4{0}+%INFO/DP4{1}, %INFO/DP4{2}+%INFO/DP4{3}\n'
' /work/m/mdsamy/DCC.vcf.gz >> /work/m/mdsamy/DCC.csv
    /work/m/mdsamy/bcftools-1.0/bcftools query -H -f
'%CHROM:%POS, [%TGT], %INFO/DP4{0}+%INFO/DP4{1}, %INFO/DP4{2}+%INFO/DP4{3}\n'
' /work/m/mdsamy/RB1a.vcf.gz >> /work/m/mdsamy/RB1a.csv

```

```
    /work/m/mdsamy/bcftools-1.0/bcftools query -H -f
'%CHROM:%POS,[%TGT],%INFO/DP4{0}+%INFO/DP4{1},%INFO/DP4{2}+%INFO/DP4{3}\n
' /work/m/mdsamy/RB1b.vcf.gz >> /work/m/mdsamy/RB1b.csv
    /work/m/mdsamy/bcftools-1.0/bcftools query -H -f
'%CHROM:%POS,[%TGT],%INFO/DP4{0}+%INFO/DP4{1},%INFO/DP4{2}+%INFO/DP4{3}\n
' /work/m/mdsamy/RB1c.vcf.gz >> /work/m/mdsamy/RB1c.csv
    rm -rf /work/m/mdsamy/BAM_Files
done
```
