# Supplementary material
Source: publisher figshare collection journal article supplement (https://tandf.figshare.com/articles/dataset/_/3175123)
Supplement: Supplementary file 2 [file 2]

```
URL=$(awk -F ',' '/1120/ {print $1}' APC_ALL.csv)
for File in $URL; do
    CHR=`echo "$File" | awk -F: '{print $2}'`
    CHRPre=$((CHR - 1))
    CHRPost=$((CHR + 1))
    samtools-1.0/samtools faidx GRCh37-lite.fa 11:$CHRPre-$CHRPost >>
    APC_ALL_Context.csv
done
```
