# Supplementary material
Source: publisher figshare collection journal article supplement (https://tandf.figshare.com/articles/dataset/_/3175123)
Supplement: Supplementary file 3 [file 2]

## Code Walkthrough for cg.php

- The script begins after accepting the starting CSV filename as an argument and separates the cells into an array
- The script defines what a CpG Dinucleotide is and creates a function to test for it (a CpG would be either CG\* or \*CG in the “Context” cell of the CSV
- The script then tests the initial triplets to see if there was a CpG present initially or not and stores this value
- The script takes the variant allele and replaces the original sequence with it, checking again if a CpG island is formed. If no CpG island is formed but there was one initially, it is recorded as “Destroyed CpG”
- After getting results for each variant, columns for all tested cases and their results are appended to the CSV and saved.
